# Supplementary material
Source: PubMed Central journal article supplement (PMC2171163)
Supplement: JCI0833700sd.pdf [file JCI0833700sd.pdf]

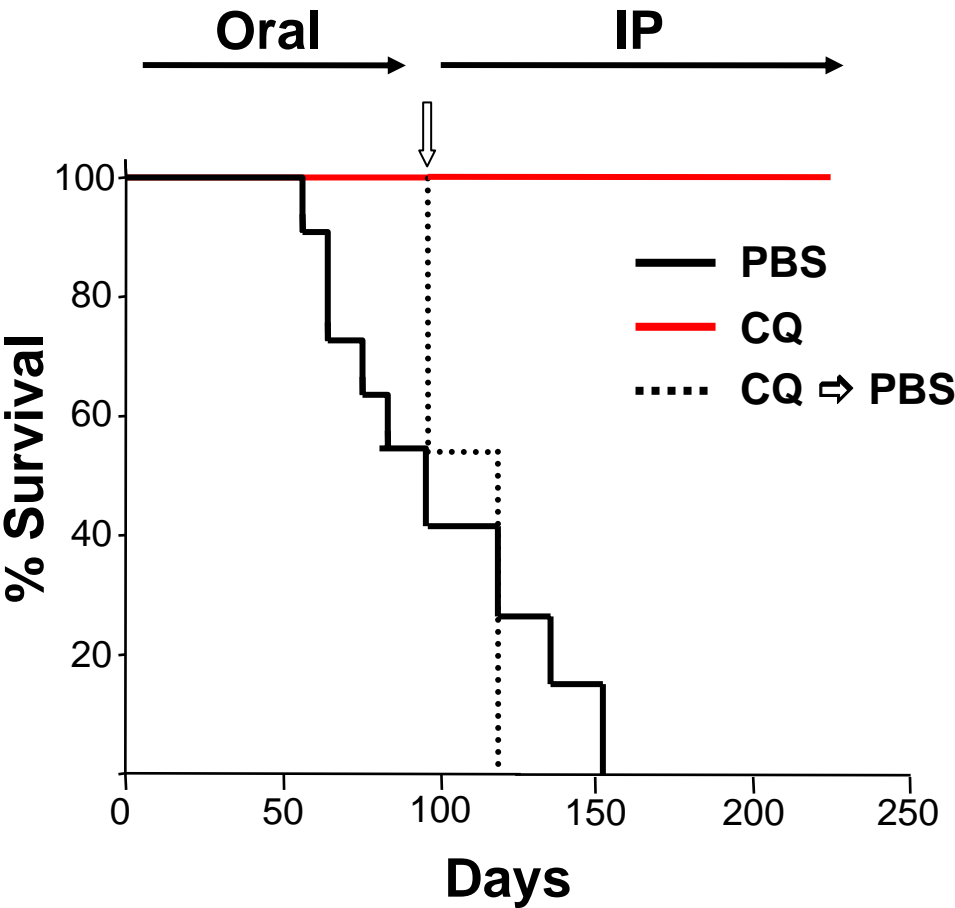

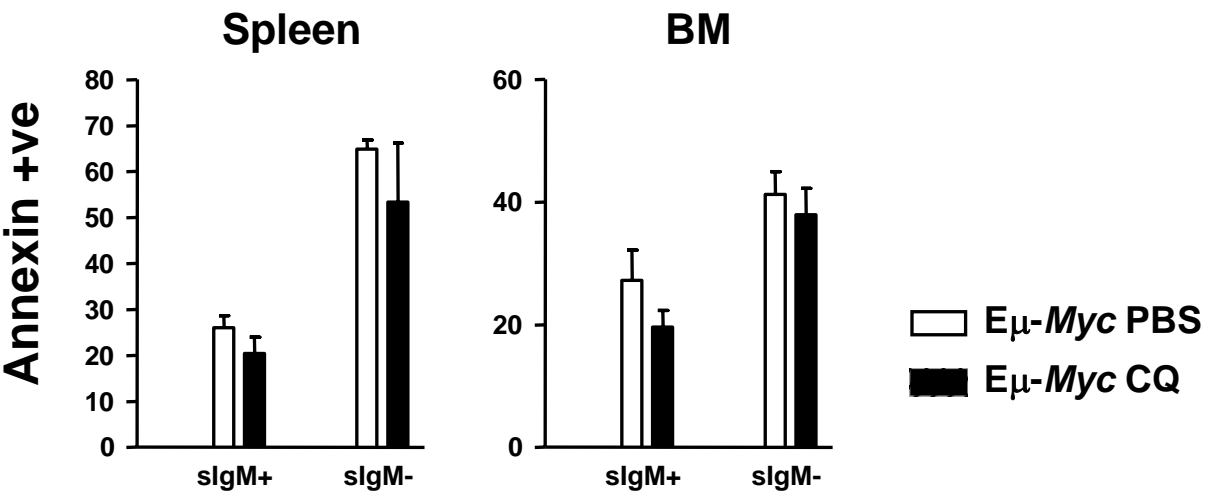

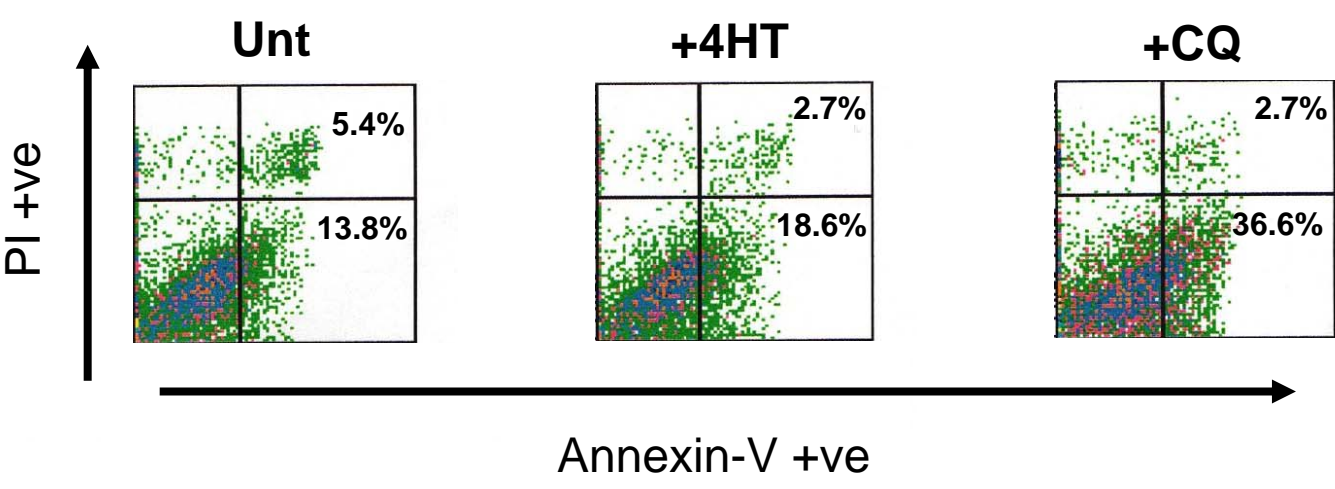

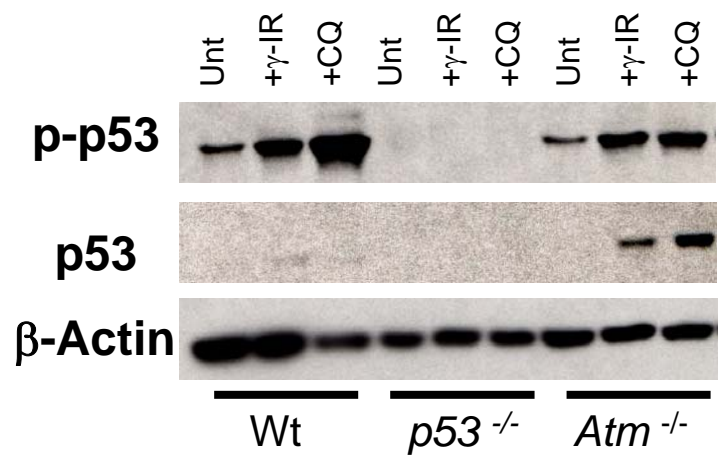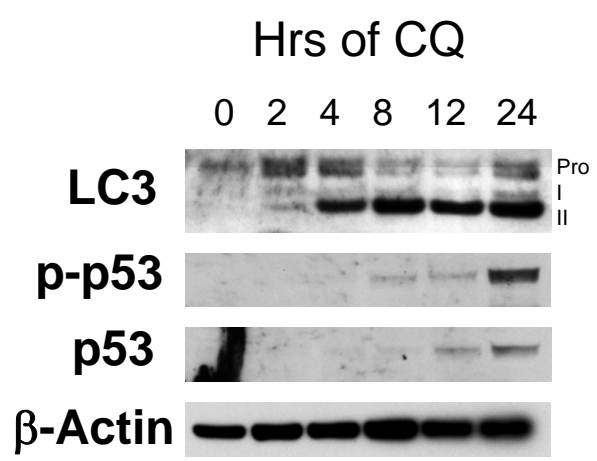

# Human Foreskin Fibroblasts

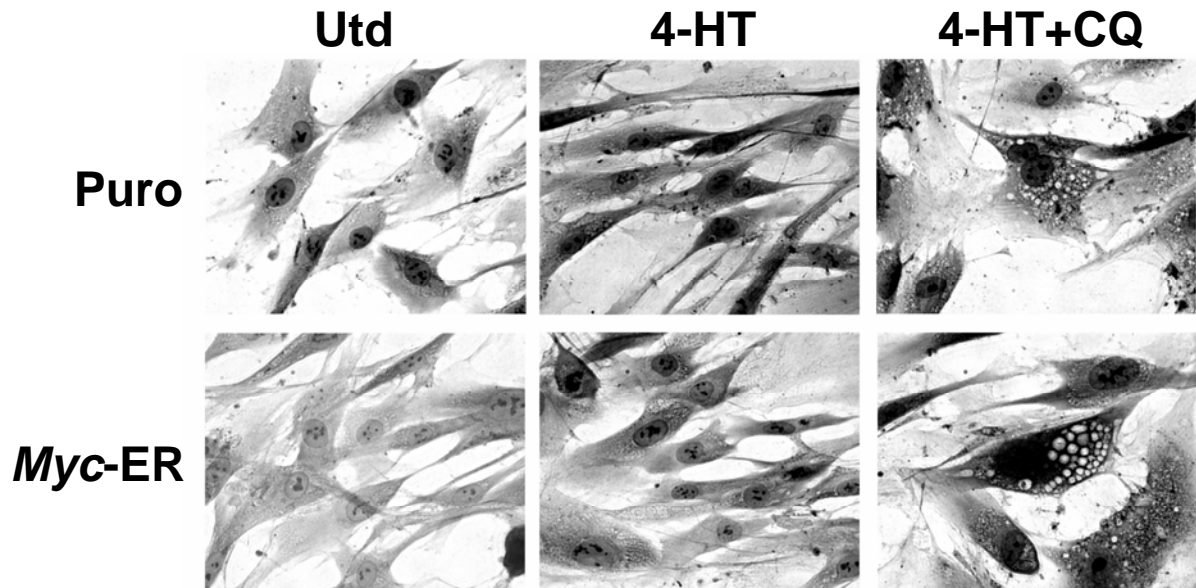

**A**

**HeLa**

**Untreated**

**CQ**

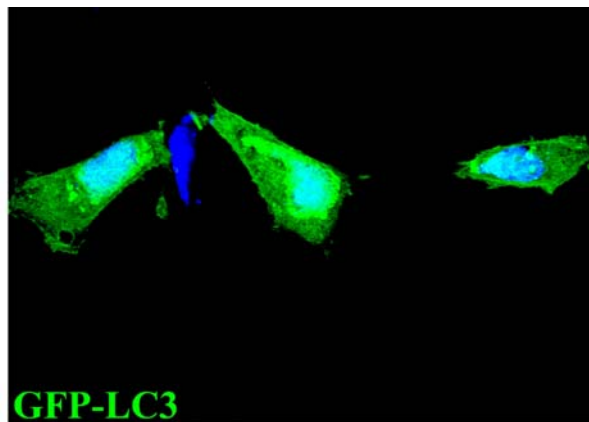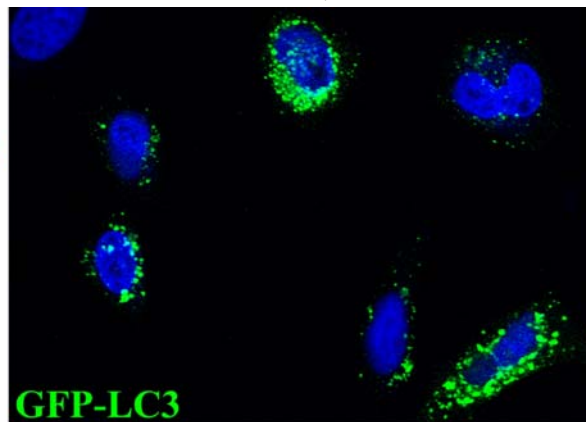

**B**

**Untreated**

**CQ**

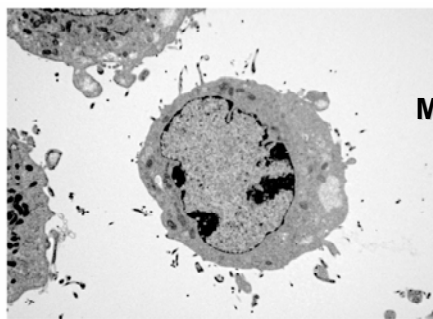

2 $\mu$ m

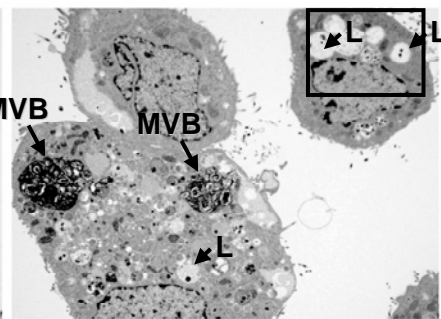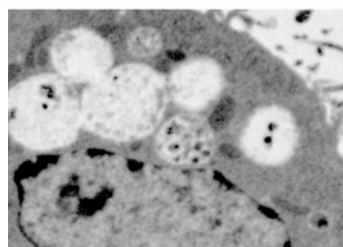

# Supplementary Material

## Cancer chemoprevention by disrupting lysosomal function and inducing p53-dependent cell death

Kirsteen H. Maclean,<sup>1\*</sup> Frank C. Dorsey,<sup>2\*</sup>  
John L. Cleveland,<sup>2#</sup> and Michael B. Kastan<sup>1#</sup>

<sup>1</sup>St. Jude Children's Research Hospital, Memphis, Tennessee, USA.

<sup>2</sup>The Scripps Research Institute-Florida, Jupiter, Florida, USA.

#Correspondence: [michael.kastan@stjude.org](mailto:michael.kastan@stjude.org); [jcleve@scripps.edu](mailto:jcleve@scripps.edu)

\* Both of these authors have equal contribution

---

### Supplementary online materials:

Supplementary Figure S1  
Supplementary Figure S2  
Supplementary Figure S3  
Supplementary Figure S4  
Supplementary Figure S5  
Supplementary Figure S6  
Supplementary Video V1

## Supplementary Video V2

### Supplemental Figure S1

Oral/I.P. administration of chloroquine impairs Myc-induced lymphoma development. Beginning at weaning (4 weeks), wild type and E $\mu$ -Myc mice were given 15mg chloroquine/liter in their drinking water, or they were provided with normal drinking water ( $n = 8$  for each group). Due to signs of muscle wasting at day 100 of treatment (evident in both wild type non-transgenic and E $\mu$ -Myc littermates, data not shown) mice were shifted to 3.5 mg/kg chloroquine (in PBS) I.P. every five days, or they received PBS alone. Median survival time was 90 days for mice treated with water/PBS alone versus >400 days for mice treated with this regimen of chloroquine. By contrast, when E $\mu$ -Myc mice on this regimen were removed from chloroquine, they rapidly succumbed to lymphoma (dotted line,  $n = 4$ ).

### Supplemental Figure S2

Effect of chloroquine on apoptosis in vivo. Beginning at 4 weeks, E $\mu$ -Myc transgenics were injected with 3.5 mg/kg chloroquine (CQ, in PBS) I.P. every five days, or they were injected with PBS alone. At 7 weeks mice were sacrificed and B220<sup>+</sup> B cells derived from both the spleen and bone marrow and analyzed for apoptosis using annexin-V.

### Supplemental Figure S3

Chloroquine induces apoptosis in MEFs. Early passage (p2) wild type MEFs expressing the MSCV-Myc-ER<sup>TAM</sup>-IRES-puro retrovirus were treated for 24 h with 4-HT to activate

*Myc-ER*<sup>TAM</sup> and left untreated or were treated with 50μM chloroquine (CQ) for 24h. The percentage of apoptotic cell death was determined by staining cells with Annexin-V. Results shown are representative of three independent experiments.

#### **Supplemental Figure S4**

Chloroquine induces p53 in primary MEFs. *Top Panel:* Early passage (p2) wild type, *p53*<sup>-</sup>, and *Atm*-deficient, MEFs were treated with 50μM chloroquine (CQ) for 24h. Effects on p53 were assessed by western blot, γ-IR treated MEFs were used as a positive control for p53 induction. *Bottom Panel:* Early passage wild type MEFs were treated with chloroquine (CQ, 50 μM) and at the indicated intervals cell extracts were prepared and assessed for modifications of LC3, p53, phosphor-Ser<sup>15</sup>-p53, and β-actin by western blot analyses. Note that LC3 modification greatly precedes increases in the steady state levels of p53 as well as the activation of p53.

#### **Supplemental Figure S5**

Chloroquine provokes vesiculation in human diploid fibroblasts. Human foreskin fibroblasts (HFF) were transduced with the MSCV-IRES-puro or MSCV-*Myc-ER*<sup>TAM</sup>-IRES-puro retroviruses. Puromycin-resistant cells were then expanded in culture and were expressing (HFF/*Myc-ER*) human fibroblasts were left untreated (Unt) or were treated with 4-HT (1 μM) +/- CQ (50μM) for 12h. Cells were fixed, washed and then stained with Geimsa. Magnifications shown are 60x. Note the numerous cytoplasmic vesicles in cells treated with CQ.

## Supplemental Figure S6.

Chloroquine provokes hallmarks of macroautophagy in HeLa cells. **(A)** Chloroquine provokes the re-localization of LC3. HeLa cells were transfected with a rat GFP-LC3B expression construct and GFP<sup>+</sup> cells were left untreated or were treated with CQ (50 $\mu$ M) for 3h. Cells were fixed with 4% (w/v) paraformaldehyde, washed in PBS, and mounted in 50% glycerol. Fluorescent cells were visualized using Zeiss Axioplan fluorescence microscope. Images shown are 100x and representative of three independent experiments. The relocalization of GFP-LC3 is used as a marker of macroautophagy (36). **(B)** HeLa cells were left untreated or were treated with CQ (50 $\mu$ M) for 24h. Cells were then fixed with 4% (w/v) paraformaldehyde and then with 1% (v/v) glutaraldehyde and 1- $\mu$ M sections were analyzed by transmission electron microscopy. Images shown are 5,000x. Magnified versions of the boxed regions containing lysosomes in CQ-treated cells are shown. **L**, lysosomes; **MVB**, Multi-vesicular bodies, thought to be products of late (acidic) endosomes, where membranes invaginate upon themselves, were extremely large in CQ-treated cells.

## Supplemental Videos

The Supplementary Videos were performed using early-passage wild-type MEFs that were transduced with MSCV-GFP-LC3B-IRES-Puro retrovirus, and sorted for GFP expression. Prior to treatment with 50 $\mu$ M CQ, cells were labeled with 100nM LysoTracker™ Red for 30 minutes and washed extensively in cell culture medium. Both videos were generated by collecting images every 5 minutes for 4 hours and thus

contain 49 individual images. Supplementary Video 1 demonstrates the potent induction of autophagic vesiculation induced by CQ treatment, and its corresponding effects on lysosomal size and number. Supplementary Video 2 provides a demonstrates that GFP-LC3 positive vesicles form first, and then later become positive for Lysotracker™ staining indicating that autophagosomes are becoming acidic and/or have fused with lysosomal compartments. Images were collected on a Nikon inverted confocal microscope.
